# Supplementary material for: Study protocol for The GOAL Trial: comprehensive geriatric assessment for frail older people with chronic kidney disease to increase attainment of patient-identified goals—a cluster randomised controlled trial
Source: Springer Nature journal article supplement (doi:10.1186/s13063-023-07363-4), 2023-05-30

# GOAL

ENHANCING PATIENT-CENTRED CARE

## Medical Appointments Diary

Participant ID:      -

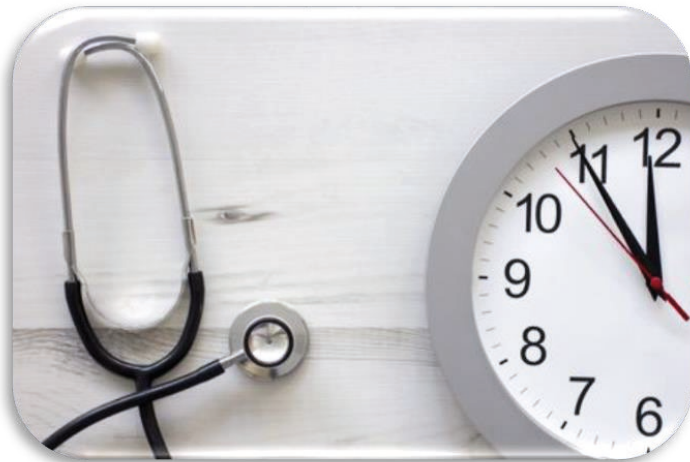

**PLEASE USE THIS  
THROUGHOUT THE GOAL  
TRIAL**

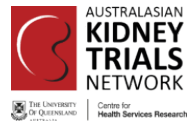

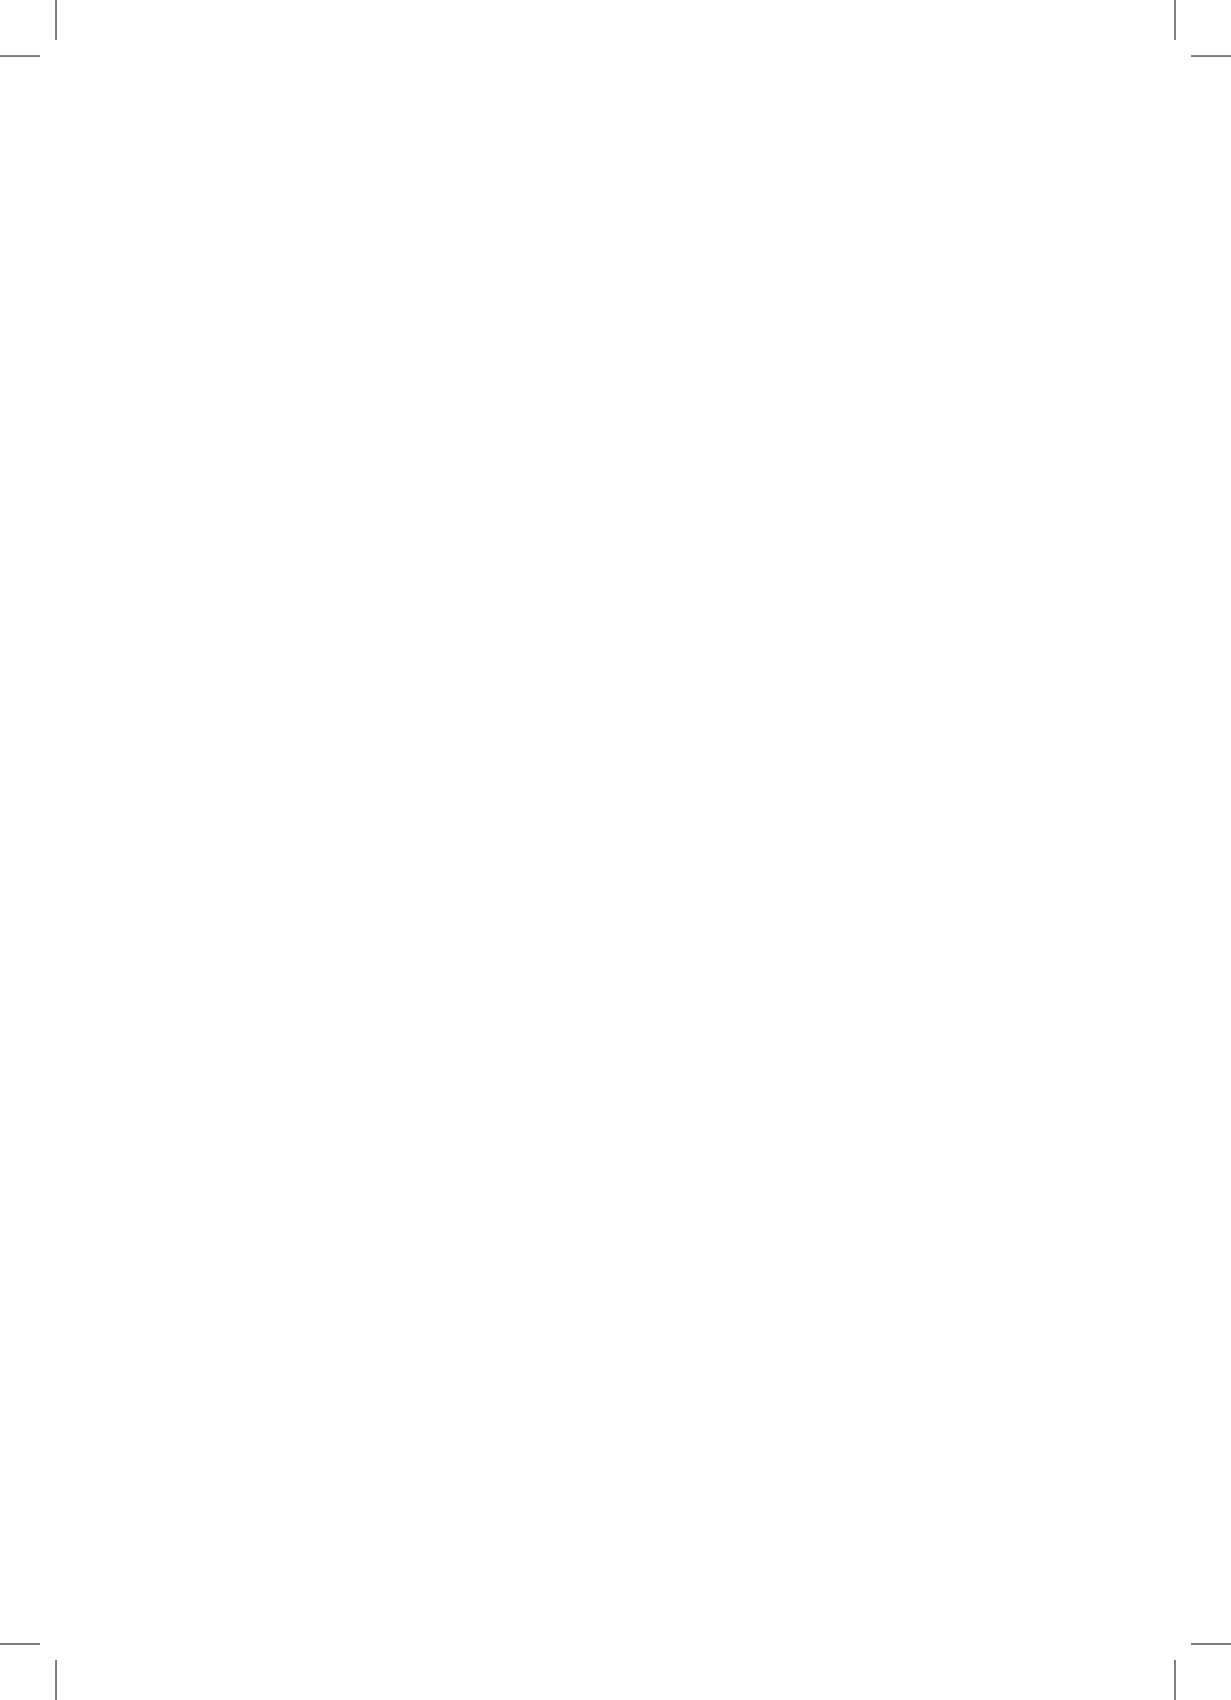

## Why do I have to complete this diary?

The information will help the research team to study the resources needed to provide consistent and high-quality healthcare in future.

## What do I need to do?

- Note your medical or health care appointments or tests
- A new diary will be given to you when you join the GOAL trial and at your 3- and 6-month review appointments
- Complete and return the diary at your next GOAL Trial review appointment

## What do I record?

Any medical/health appointments that are day appointments. Some examples are below but you may have others:

- Nephrologist (Kidney)
- Geriatrician (doctor for elderly)
- Surgeon
- Physician
- Psychiatrist
- Ophthalmologist (eye)
- Cardiologist (heart)
- Chiropractor
- Dietitian
- Physiotherapy
- Occupational therapy
- Psychologist
- Respiratory specialist (lung)
- Community nurse
- Massage therapist
- X-rays
- CT scan
- Ultrasound scan
- MRI scan
- PET scan
- Bone scan
- Mammogram

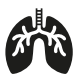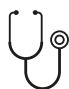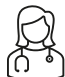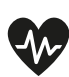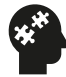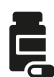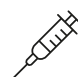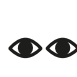

# Medical/health appointments

(Excluding overnight hospital stays)

|                  |  |
|------------------|--|
| Date             |  |
| Appointment/test |  |
|                  |  |

|                  |  |
|------------------|--|
| Date             |  |
| Appointment/test |  |
|                  |  |

|                  |  |
|------------------|--|
| Date             |  |
| Appointment/test |  |
|                  |  |

|                  |  |
|------------------|--|
| Date             |  |
| Appointment/test |  |
|                  |  |

|                  |  |
|------------------|--|
| Date             |  |
| Appointment/test |  |
|                  |  |

|                  |  |
|------------------|--|
| Date             |  |
| Appointment/test |  |
|                  |  |

|                  |  |
|------------------|--|
| Date             |  |
| Appointment/test |  |
|                  |  |

|                  |  |
|------------------|--|
| Date             |  |
| Appointment/test |  |
|                  |  |

|                  |  |
|------------------|--|
| Date             |  |
| Appointment/test |  |
|                  |  |

|                  |  |
|------------------|--|
| Date             |  |
| Appointment/test |  |
|                  |  |

|                  |  |
|------------------|--|
| Date             |  |
| Appointment/test |  |
|                  |  |

|                  |  |
|------------------|--|
| Date             |  |
| Appointment/test |  |
|                  |  |

|                  |  |
|------------------|--|
| Date             |  |
| Appointment/test |  |
|                  |  |

|                  |  |
|------------------|--|
| Date             |  |
| Appointment/test |  |
|                  |  |

|                  |  |
|------------------|--|
| Date             |  |
| Appointment/test |  |
|                  |  |

|                  |  |
|------------------|--|
| Date             |  |
| Appointment/test |  |
|                  |  |

|                  |  |
|------------------|--|
| Date             |  |
| Appointment/test |  |
|                  |  |

|                  |  |
|------------------|--|
| Date             |  |
| Appointment/test |  |
|                  |  |

|                  |  |
|------------------|--|
| Date             |  |
| Appointment/test |  |
|                  |  |

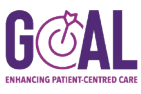

|                  |  |
|------------------|--|
| Date             |  |
| Appointment/test |  |
|                  |  |

|                  |  |
|------------------|--|
| Date             |  |
| Appointment/test |  |
|                  |  |

|                  |  |
|------------------|--|
| Date             |  |
| Appointment/test |  |
|                  |  |

|                  |  |
|------------------|--|
| Date             |  |
| Appointment/test |  |
|                  |  |

|                  |  |
|------------------|--|
| Date             |  |
| Appointment/test |  |
|                  |  |

|                  |  |
|------------------|--|
| Date             |  |
| Appointment/test |  |
|                  |  |

|                  |  |
|------------------|--|
| Date             |  |
| Appointment/test |  |
|                  |  |

|                  |  |
|------------------|--|
| Date             |  |
| Appointment/test |  |
|                  |  |

|                  |  |
|------------------|--|
| Date             |  |
| Appointment/test |  |
|                  |  |

|                  |  |
|------------------|--|
| Date             |  |
| Appointment/test |  |
|                  |  |

|                  |  |
|------------------|--|
| Date             |  |
| Appointment/test |  |
|                  |  |

|                  |  |
|------------------|--|
| Date             |  |
| Appointment/test |  |
|                  |  |

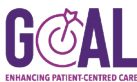



|                  |  |
|------------------|--|
| Date             |  |
| Appointment/test |  |
|                  |  |

|                  |  |
|------------------|--|
| Date             |  |
| Appointment/test |  |
|                  |  |

|                  |  |
|------------------|--|
| Date             |  |
| Appointment/test |  |
|                  |  |

|                  |  |
|------------------|--|
| Date             |  |
| Appointment/test |  |
|                  |  |

|                  |  |
|------------------|--|
| Date             |  |
| Appointment/test |  |
|                  |  |

|                  |  |
|------------------|--|
| Date             |  |
| Appointment/test |  |
|                  |  |

|                  |  |
|------------------|--|
| Date             |  |
| Appointment/test |  |
|                  |  |

|                  |  |
|------------------|--|
| Date             |  |
| Appointment/test |  |
|                  |  |

|                  |  |
|------------------|--|
| Date             |  |
| Appointment/test |  |
|                  |  |

|                  |  |
|------------------|--|
| Date             |  |
| Appointment/test |  |
|                  |  |

|                  |  |
|------------------|--|
| Date             |  |
| Appointment/test |  |
|                  |  |

|                  |  |
|------------------|--|
| Date             |  |
| Appointment/test |  |
|                  |  |



# Thank you for taking part in the GOAL Trial

## Contact Us

If you aren't sure what to record or need a new diary, contact

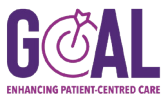

Please use this throughout the  
GOAL trial

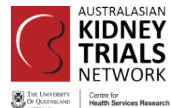

Supplement: MOESM5 [file 25423668]
